# Supplementary material
Source: MDPI journal article supplement (https://www.mdpi.com/2410-3896/8/1/9)

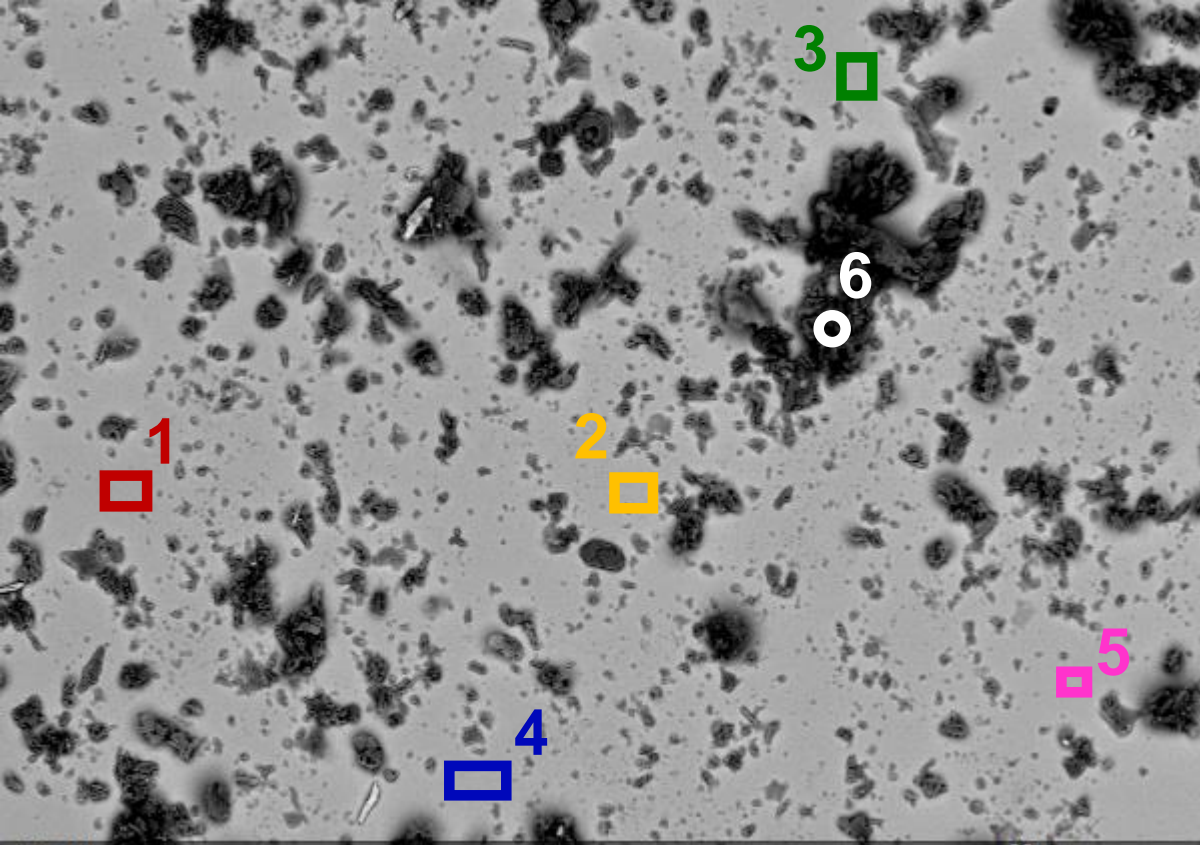

VS\_626

BSE MAG: 850x HV: 10 kV WD: 10,0 mm Px: 0,24 µm

30 µm

Supplement: s1 [file s1]

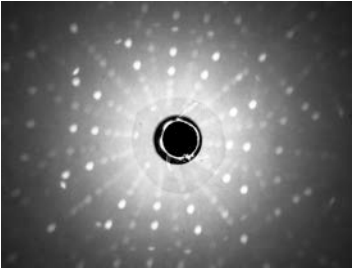

Supplement: s1 [file s1]

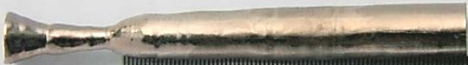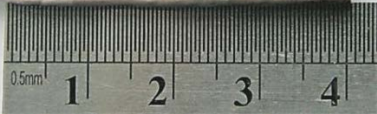

Supplement: s1 [file s1]

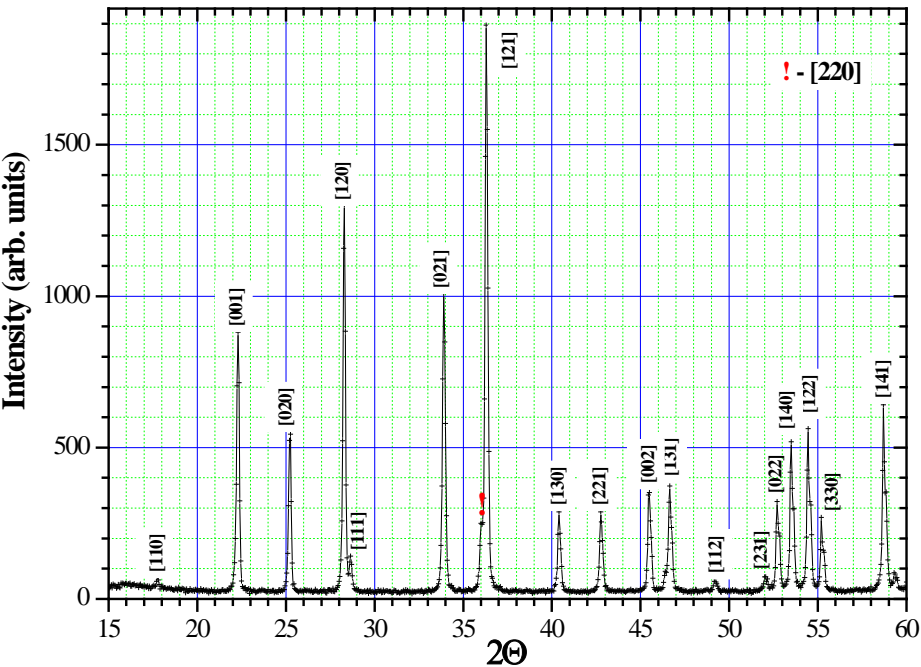

Supplement: s1 [file s1]
